# Supplementary material
Source: HighWire-hosted journal article supplement (https://erj.ersjournals.com/content/59/4/2101554)
Supplement: inline-supplementary-material-2 [file inline-supplementary-material-2.pdf]

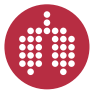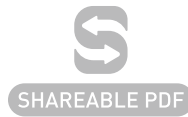

# Methionine supplementation for multi-organ dysfunction in MetRS-related pulmonary alveolar proteinosis

Alice Hadchouel <sup>1,2</sup>, David Drummond<sup>1,2</sup>, Clément Pontoizeau<sup>2,3</sup>, Laura Aoust<sup>1,2</sup>, Maria-Margarita Hurtado Nedelec<sup>4,5</sup>, Jamel El Benna<sup>4</sup>, Elsa Gachelin<sup>6</sup>, Caroline Perisson<sup>7</sup>, Clémentine Vigier<sup>8</sup>, Manuel Schiff<sup>9,10</sup>, Florence Lacaille<sup>11</sup>, Thierry Jo Molina<sup>10,12</sup>, Laureline Berteloot<sup>10,13</sup>, Sylvain Renolleau<sup>2,14</sup>, Chris Ottolenghi<sup>2,3</sup>, Jean-Marc Tréluyer<sup>2,15</sup>, Jacques de Blic<sup>1,2,16</sup> and Christophe Delacourt<sup>1,2,16</sup>

<sup>1</sup>AP-HP, Service de Pneumologie Pédiatrique, Hôpital Universitaire Necker-Enfants Malades, Centre de Référence pour les Maladies Respiratoires Rares de l'Enfant, Paris, France. <sup>2</sup>Faculté de Médecine, Université de Paris, Paris, France. <sup>3</sup>AP-HP, UF de Métabolomique, Hôpital Universitaire Necker-Enfants Malades, Paris, France. <sup>4</sup>INSERM-U1149, Faculté de Médecine, Centre de Recherche sur l'Inflammation (CRI), CNRS-ERL8252, Laboratoire d'Excellence Inflammex, Université Paris Diderot-Sorbonne Paris Cité, Paris, France. <sup>5</sup>AP-HP, UF Dysfonctionnements Immunitaires, Centre Hospitalier Universitaire Xavier Bichat, Paris, France. <sup>6</sup>Service de Pédiatrie, CHU Reunion site Félix Guyon, Saint Denis, France. <sup>7</sup>Service de Pédiatrie, CHU Reunion site Sud, Saint Pierre, France. <sup>8</sup>Service de Pédiatrie, CHU de Rennes, Rennes, France. <sup>9</sup>AP-HP, Service de Maladies Héritaires du Métabolisme, Hôpital Necker-Enfants Malades, Centre de Référence Maladies Héritaires du Métabolisme, Paris, France. <sup>10</sup>Institut Imagine, Inserm UMRS 1163, Paris, France. <sup>11</sup>AP-HP, Service de Gastroentérologie-Hépatologie-Nutrition Pédiatrique, Hôpital Necker-Enfants Malades, Paris, France. <sup>12</sup>AP-HP, Service de Pathologie, Hôpital Universitaire Necker-Enfants Malades, Paris, France. <sup>13</sup>AP-HP, Service d'Imagerie Pédiatrique, Hôpital Universitaire Necker-Enfants Malades, Paris, France. <sup>14</sup>AP-HP, Service de Réanimation Médico-Chirurgicale Pédiatrique, Hôpital Universitaire Necker-Enfants Malades, Paris, France. <sup>15</sup>Groupe Hospitalier APHP Centre Université de Paris Recherche Clinique et Pharmacologie Necker Cochin, Paris, France. <sup>16</sup>J. de Blic and C. Delacourt contributed equally to this article

Corresponding author: Alice Hadchouel ([alice.hadchouel-duverge@aphp.fr](mailto:alice.hadchouel-duverge@aphp.fr))

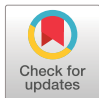

Shareable abstract (@ERSpublications)

**Pulmonary alveolar proteinosis related to mutations in *MARS1* is a rare and severe lung disease with early onset and no curative treatment to date. In four affected children we showed that methionine supplementation is an effective treatment.** <https://bit.ly/2WlbcOz>

**Cite this article as:** Hadchouel A, Drummond D, Pontoizeau C, *et al.* Methionine supplementation for multi-organ dysfunction in MetRS-related pulmonary alveolar proteinosis. *Eur Respir J* 2022; 59: 2101554 [DOI: 10.1183/13993003.01554-2021].

This single-page version can be shared freely online.

Copyright ©The authors 2022.  
For reproduction rights and permissions contact [permissions@ersnet.org](mailto:permissions@ersnet.org)

This article has an editorial commentary:  
<https://doi.org/10.1183/13993003.02971-2021>

Received: 2 June 2021  
Accepted: 17 Aug 2021

## Abstract

**Introduction** Pulmonary alveolar proteinosis related to mutations in the methionine tRNA synthetase (*MARS1*) gene is a severe, early-onset disease that results in death before the age of 2 years in one-third of patients. It is associated with a liver disease, growth failure and systemic inflammation. As methionine supplementation in yeast models restored normal enzymatic activity of the synthetase, we studied the tolerance, safety and efficacy of daily oral methionine supplementation in patients with severe and early disease.

**Methods** Four patients received methionine supplementation and were followed for respiratory, hepatic, growth and inflammation-related outcomes. Their course was compared to those of historical controls. Reactive oxygen species production by patient monocytes before and after methionine supplementation was also studied.

**Results** Methionine supplementation was associated with respiratory improvement, clearance of the extracellular lipoproteinaceous material and discontinuation of whole-lung lavage in all patients. The three patients who required oxygen or noninvasive ventilation could be weaned off within 60 days. In addition, liver dysfunction, inflammation and growth delay improved or resolved. At a cellular level, methionine supplementation normalised the production of reactive oxygen species by peripheral monocytes.

**Conclusion** Methionine supplementation was associated with important improvements in children with pulmonary alveolar proteinosis related to mutations in the *MARS1* gene. This study paves the way for similar strategies for other tRNA synthetase deficiencies.
